# Supplementary material
Source: Research Square preprint supplement (doi:10.21203/rs.3.rs-10214817/v1)
Supplement: Supplementary file 1 [file 2e2915dd714416381dbf543a.docx]

**Additional information**

**Additional Table S1. Summary of tick collection data.**

**Additional Table S2. Performance metrics of the initial full models.**

**Additional Figure S1. Occurrence of notifiable tick-borne diseases and population size at the prefectural level.** The number of reported cases of SFTS, TBE, JSF, LD, and RF from 2013 to 2025 (https://id-info.jihs.go.jp/surveillance/idwr/idwr/index.html, accessed February 9, 2026) and population size in 2020 (<https://www.e-stat.go.jp/dbview?sid=0003445078>, accessed February 9, 2026) are mapped at the prefectural level. Prefectural boundaries are indicated by grey lines.

**Additional Figure S2. Response curves of the final models.**

**Additional Figure S3. Binary potential distribution maps of 16 major tick species in Japan.** The predicted habitat suitability (Fig. 3) was converted to binary format (presence or absence) using the mean threshold that maximized the TSS.

**Additional Figure S4. Prefectural-level occupancy rates of 16 major tick species in Japan.** The binary maps (Additional Figure S3) were converted to the occupancy rate for each prefecture: the occupancy rate was defined as the percentage of grids predicted as present out of the total number of grids in the prefecture.
