# Supplementary material
Source: Research Square preprint supplement (doi:10.21203/rs.3.rs-10214817/v1)
Supplement: Supplementary file 2 [file 7cdee48787627b72ad0ab022.xlsx]

## Sheet: TableS2_nationalmap_ver1.0
	AUC			TSS			CBI		ΔAUC
Tick species	Mean	SD		Mean	SD		Mean	SD
Amblyomma testudinarium	0.88	0.02		0.67	0.05		0.66	0.15	0.06
Dermacentor bellulus	0.77	0.11		0.54	0.17		0.8	0.08	0.21
Haemaphysalis concinna	0.92	0.06		0.82	0.1		0.5	0.4	0.06
Haemaphysalis flava	0.78	0.01		0.46	0.04		0.88	0.04	0.1
Haemaphysalis formosensis	0.92	0.02		0.77	0.05		0.73	0.16	0.04
Haemaphysalis hystricis	0.91	0.02		0.73	0.05		0.74	0.11	0.04
Haemaphysalis japonica	0.87	0.02		0.68	0.05		0.77	0.1	0.05
Haemaphysalis kitaokai	0.85	0.04		0.59	0.1		0.85	0.06	0.06
Haemaphysalis longicornis	0.85	0.02		0.58	0.05		0.84	0.08	0.08
Haemaphysalis megaspinosa	0.84	0.02		0.56	0.05		0.82	0.07	0.09
Ixodes monospinosus	0.82	0.1		0.7	0.14		0.73	0.22	0.1
Ixodes nipponensis	0.67	0.11		0.46	0.17		0.76	0.1	0.22
Ixodes ovatus	0.8	0.03		0.5	0.06		0.88	0.08	0.08
Ixodes pavlovskyi	0.96	0.03		0.85	0.08		0.84	0.11	0.03
Ixodes persulcatus	0.93	0.02		0.73	0.04		0.92	0.03	0.03
Ixodes turdus	0.8	0.06		0.63	0.07		0.75	0.1	0.16
